# Supplementary material for: Inhibiting Histone Deacetylase 2 (HDAC2) Promotes Functional Recovery From Stroke
Source: PubMed Central journal article supplement — J Am Heart Assoc. 2017 Oct 5;6(10):e007236. doi: 10.1161/JAHA.117.007236 (PMC5721897; doi:10.1161/jaha.117.007236), 2017-10-05
Supplement: JAH3-6-e007236-s001.pdf [file JAH3-6-e007236-s001.pdf]

# **SUPPLEMENTAL MATERIAL**

**Table S1.** Behavioral assessment of HDAC2 knockdown on functional recovery from stroke.

|                                                                   | Pre-operation |                          |             | 11 d after stroke |                          |              | 18 d after stroke |                          |              | 25 d after stroke |                          |              |
|-------------------------------------------------------------------|---------------|--------------------------|-------------|-------------------|--------------------------|--------------|-------------------|--------------------------|--------------|-------------------|--------------------------|--------------|
|                                                                   | Stroke        |                          |             | Stroke            |                          |              | Stroke            |                          |              | Stroke            |                          |              |
|                                                                   | Sham          | LV-GFPLV-HDAC2-shRNA-GFP |             | Sham              | LV-GFPLV-HDAC2-shRNA-GFP |              | Sham              | LV-GFPLV-HDAC2-shRNA-GFP |              | Sham              | LV-GFPLV-HDAC2-shRNA-GFP |              |
|                                                                   | (n =10)       | (n =13)                  | (n =13)     | (n =10)           | (n =13)                  | (n =13)      | (n =10)           | (n =13)                  | (n =13)      | (n =10)           | (n =13)                  | (n =13)      |
| Foot faults relative to total steps taken (%) [ <i>forelimb</i> ] | 7.80 ± 0.47   | 8.19 ± 0.43              | 7.50 ± 0.53 | 8.24 ± 0.73       | 28.47 ± 1.81             | 18.40 ± 1.64 | 8.19 ± 0.43       | 25.14 ± 0.89             | 17.43 ± 1.67 | 8.11 ± 0.63       | 23.98 ± 1.30             | 16.22 ± 0.72 |
| Foot faults relative to total steps taken (%) [ <i>hindlimb</i> ] | 1.86 ± 0.63   | 1.78 ± 0.50              | 1.81 ± 0.50 | 1.99 ± 0.69       | 6.65 ± 0.27              | 3.59 ± 0.60  | 1.70 ± 0.60       | 5.91 ± 0.17              | 3.55 ± 0.84  | 1.41 ± 0.74       | 6.28 ± 0.39              | 2.91 ± 0.67  |
| Time spent on right paw relative to left (%)                      | 0.57 ± 1.25   | 0.20 ± 1.06              | 0.32 ± 0.95 | 0.24 ± 0.96       | 25.41 ± 2.81             | 16.60 ± 1.54 | 0.87 ± 0.51       | 23.55 ± 2.22             | 15.93 ± 1.82 | 0.77 ± 0.81       | 18.04 ± 2.18             | 10.92 ± 1.54 |

**Table S2.** Behavioral assessment of HDAC2 over-expression on functional recovery from stroke.

|                                                                   | Pre-operation |                           |                   | 11 d after stroke |                           |                   | 18 d after stroke |                           |                   | 25 d after stroke |                           |                   |
|-------------------------------------------------------------------|---------------|---------------------------|-------------------|-------------------|---------------------------|-------------------|-------------------|---------------------------|-------------------|-------------------|---------------------------|-------------------|
|                                                                   | Sham          | Stroke                    |                   | Sham              | Stroke                    |                   | Sham              | Stroke                    |                   | Sham              | Stroke                    |                   |
|                                                                   |               | Ad-inactive<br>HDAC2-Flag | Ad-HDAC2-<br>Flag |                   | Ad-inactive<br>HDAC2-Flag | Ad-HDAC2-<br>Flag |                   | Ad-inactive<br>HDAC2-Flag | Ad-HDAC2-<br>Flag |                   | Ad-inactive<br>HDAC2-Flag | Ad-HDAC2-<br>Flag |
|                                                                   | (n =10)       | (n =13)                   | (n =13)           | (n =10)           | (n =13)                   | (n =13)           | (n =10)           | (n =13)                   | (n =13)           | (n =10)           | (n =13)                   | (n =13)           |
| Foot faults relative to total steps taken (%) [ <i>forelimb</i> ] | 7.84 ± 0.71   | 7.28 ± 0.52               | 8.06 ± 0.54       | 8.22 ± 0.75       | 18.94 ± 0.70              | 30.06 ± 1.19      | 8.27 ± 0.65       | 16.86 ± 0.89              | 26.73 ± 1.15      | 6.58 ± 0.62       | 14.53 ± 0.75              | 19.59 ± 0.61      |
| Foot faults relative to total steps taken (%) [ <i>hindlimb</i> ] | 1.85 ± 0.26   | 1.68 ± 0.38               | 1.70 ± 0.25       | 1.33 ± 0.24       | 4.24 ± 0.26               | 7.18 ± 1.19       | 1.83 ± 0.29       | 4.31 ± 0.83               | 7.47 ± 0.53       | 1.69 ± 0.30       | 3.99 ± 0.28               | 6.69 ± 0.90       |
| Time spent on right paw relative to left (%)                      | 0.01 ± 0.93   | 0.07 ± 0.70               | 0.24 ± 1.20       | 0.27 ± 0.36       | 18.42 ± 1.56              | 26.06 ± 2.64      | 0.03 ± 1.50       | 12.62 ± 1.33              | 20.04 ± 2.33      | 0.05 ± 0.79       | 11.24 ± 1.60              | 16.07 ± 1.01      |

**Table S3.** Behavioral assessment of TSA on functional recovery from stroke in WT mice.

| WT                                                                | Pre-operation   |                    |                | 11 d after stroke |                    |                | 18 d after stroke |                    |                | 25 d after stroke |                    |                |
|-------------------------------------------------------------------|-----------------|--------------------|----------------|-------------------|--------------------|----------------|-------------------|--------------------|----------------|-------------------|--------------------|----------------|
|                                                                   | Sham<br>(n = 7) | Stroke             |                | Sham<br>(n = 7)   | Stroke             |                | Sham<br>(n = 7)   | Stroke             |                | Sham<br>(n = 7)   | Stroke             |                |
|                                                                   |                 | Vehicle<br>(n = 7) | TSA<br>(n = 7) |                   | Vehicle<br>(n = 7) | TSA<br>(n = 7) |                   | Vehicle<br>(n = 7) | TSA<br>(n = 7) |                   | Vehicle<br>(n = 7) | TSA<br>(n = 7) |
| Foot faults relative to total steps taken (%) [ <i>forelimb</i> ] | 9.14 ± 1.08     | 9.35 ± 0.32        | 8.94 ± 0.45    | 9.45 ± 0.73       | 27.14 ± 1.79       | 19.53 ± 1.49   | 9.70 ± 0.48       | 24.79 ± 1.09       | 17.21 ± 0.62   | 9.14 ± 0.25       | 21.40 ± 0.96       | 15.12 ± 0.53   |
| Foot faults relative to total steps taken (%) [ <i>hindlimb</i> ] | 2.05 ± 1.06     | 2.10 ± 0.89        | 2.01 ± 0.48    | 1.98 ± 0.25       | 6.28 ± 0.40        | 3.84 ± 0.25    | 2.25 ± 0.50       | 5.38 ± 0.34        | 3.33 ± 0.25    | 1.83 ± 0.60       | 5.20 ± 0.39        | 2.75 ± 0.37    |
| Time spent on right paw relative to left (%)                      | 0.53 ± 0.20     | 0.24 ± 0.61        | 0.61 ± 0.24    | 1.76 ± 0.79       | 30.10 ± 3.43       | 17.37 ± 1.16   | 0.35 ± 0.13       | 25.76 ± 2.13       | 16.82 ± 0.78   | 0.62 ± 0.55       | 24.44 ± 2.06       | 13.82 ± 1.01   |

**Table S4.** Behavioral assessment of TSA on functional recovery from stroke in *Hdac2* CKO mice.

| <i>Hdac2</i> CKO                                                  | Pre-operation   |                    |                | 11 d after stroke |                    |                | 18 d after stroke |                    |                | 25 d after stroke |                    |                |
|-------------------------------------------------------------------|-----------------|--------------------|----------------|-------------------|--------------------|----------------|-------------------|--------------------|----------------|-------------------|--------------------|----------------|
|                                                                   | Stroke          |                    |                | Stroke            |                    |                | Stroke            |                    |                | Stroke            |                    |                |
|                                                                   | Sham<br>(n = 7) | Vehicle<br>(n = 7) | TSA<br>(n = 7) | Sham<br>(n = 7)   | Vehicle<br>(n = 7) | TSA<br>(n = 7) | Sham<br>(n = 7)   | Vehicle<br>(n = 7) | TSA<br>(n = 7) | Sham<br>(n = 7)   | Vehicle<br>(n = 7) | TSA<br>(n = 7) |
| Foot faults relative to total steps taken (%) [ <i>forelimb</i> ] | 9.51 ± 0.60     | 9.01 ± 0.50        | 8.49 ± 0.29    | 9.96 ± 0.32       | 20.05 ± 1.16       | 20.92 ± 0.71   | 8.87 ± 0.27       | 16.62 ± 1.19       | 17.03 ± 1.19   | 9.71 ± 0.53       | 15.84 ± 0.73       | 14.53 ± 0.64   |
| Foot faults relative to total steps taken (%) [ <i>hindlimb</i> ] | 1.72 ± 0.33     | 2.05 ± 0.40        | 1.85 ± 0.33    | 1.90 ± 0.48       | 3.68 ± 0.36        | 3.73 ± 0.83    | 1.92 ± 0.19       | 3.11 ± 0.47        | 3.92 ± 0.46    | 1.98 ± 0.53       | 2.93 ± 0.38        | 3.04 ± 0.47    |
| Time spent on right paw relative to left (%)                      | 0.77 ± 0.56     | 1.46 ± 0.70        | 0.61 ± 0.54    | 0.61 ± 0.44       | 14.06 ± 2.64       | 15.66 ± 1.56   | 0.37 ± 0.20       | 15.39 ± 3.04       | 14.01 ± 1.36   | 1.09 ± 0.75       | 14.67 ± 1.54       | 13.58 ± 1.22   |

**Table S5.** Behavioral assessment of SAHA on functional recovery from stroke.

|                                                                   | Pre-operation     |                    |                   | 11 d after stroke |                    |                    | 18 d after stroke |                    |                    | 25 d after stroke |                    |                    |
|-------------------------------------------------------------------|-------------------|--------------------|-------------------|-------------------|--------------------|--------------------|-------------------|--------------------|--------------------|-------------------|--------------------|--------------------|
|                                                                   | Stroke            |                    |                   | Stroke            |                    |                    | Stroke            |                    |                    | Stroke            |                    |                    |
|                                                                   | Sham<br>(n =10)   | Vehicle<br>(n =13) | SAHA<br>(n =13)   | Sham<br>(n =10)   | Vehicle<br>(n =13) | SAHA<br>(n =13)    | Sham<br>(n =10)   | Vehicle<br>(n =13) | SAHA<br>(n =13)    | Sham<br>(n =10)   | Vehicle<br>(n =13) | SAHA<br>(n =13)    |
| Foot faults relative to total steps taken (%) [ <i>forelimb</i> ] | 6.69<br>±<br>0.45 | 6.62<br>±<br>0.63  | 7.13<br>±<br>0.58 | 8.29<br>±<br>0.38 | 25.68<br>±<br>1.50 | 18.39<br>±<br>0.75 | 7.63<br>±<br>0.53 | 23.52<br>±<br>1.74 | 17.28<br>±<br>0.64 | 7.25<br>±<br>0.44 | 21.65<br>±<br>1.64 | 16.24<br>±<br>0.91 |
| Foot faults relative to total steps taken (%) [ <i>hindlimb</i> ] | 2.05<br>±<br>0.39 | 1.89<br>±<br>0.52  | 1.78<br>±<br>0.32 | 1.38<br>±<br>0.59 | 8.04<br>±<br>0.86  | 4.05<br>±<br>0.69  | 1.41<br>±<br>0.58 | 7.82<br>±<br>1.15  | 4.12<br>±<br>0.81  | 1.82<br>±<br>0.54 | 7.71<br>±<br>0.89  | 4.29<br>±<br>1.01  |
| Time spent on right paw relative to left (%)                      | 0.51<br>±<br>0.99 | 0.12<br>±<br>0.98  | 0.33<br>±<br>0.76 | 0.08<br>±<br>0.98 | 29.92<br>±<br>3.31 | 19.06<br>±<br>3.20 | 0.27<br>±<br>0.85 | 26.14<br>±<br>3.89 | 16.07<br>±<br>1.64 | 0.16<br>±<br>0.62 | 23.05<br>±<br>2.18 | 13.40<br>±<br>1.50 |

**Figure S1. Scatterplot for correlation between neuroscore and lesion size after stroke**

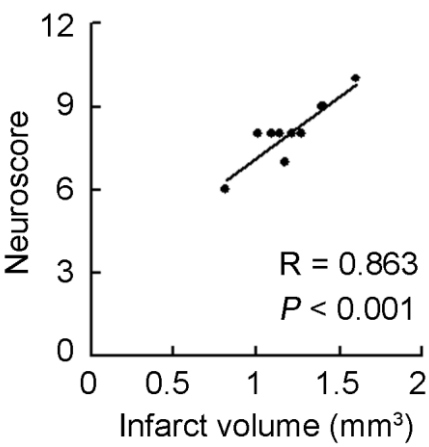

(n = 12, R = 0.863,  $P < 0.001$ ).

**Figure S2. Diagram and immunostaining showing peri-infarct cortex.**

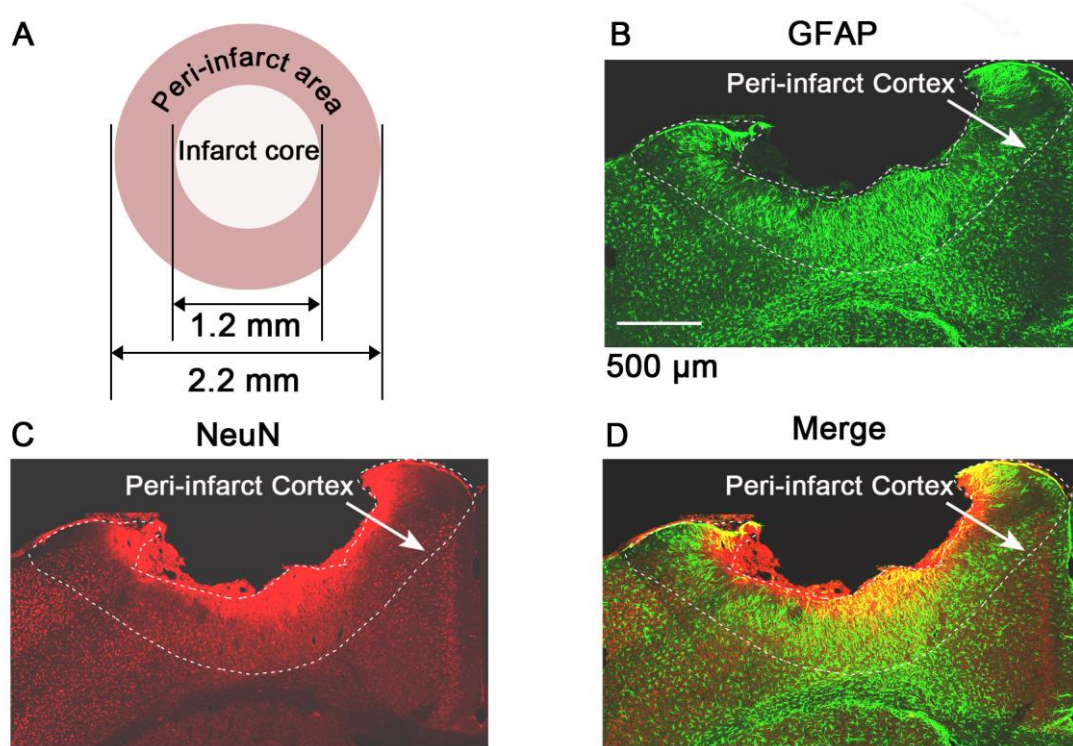

(A) The diagram showing the definition of the peri-infarct cortex for immunoblots. (B) Representative images of immunohistochemical labeling of NeuN, a transcription factor that is expressed in mature neurons. Scale bar, 500  $\mu\text{m}$ . (C) Representative images of immunohistochemical labeling of GFAP, a marker of astrocytes. (D) The merged image from (B) and (C) showing the peri-infarct area. In the peri-infarct cortex, activated astrocytes were radiately distributed. GFAP, glial fibrillary acidic protein.

**Figure S3. Confirmation of LV-HDAC2-shRNA-GFP infection.**

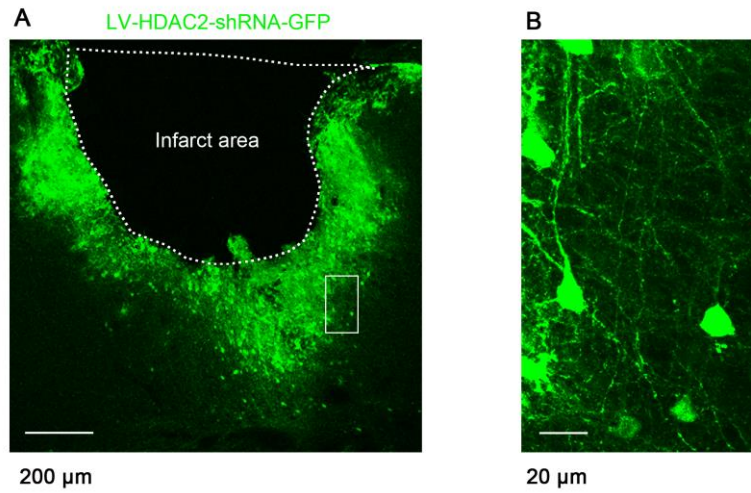

(A) A representative image showing LV-HDAC2-shRNA-GFP-infected peri-infarct cortex. (B) A high-magnification image from a selected area in leftward image. LV, lentivirus; HDAC2, histone deacetylase 2; shRNA, short hairpin RNA; GFP, green fluorescent protein.

**Figure S4. Elimination of HDAC2 protein expression in the cortex is demonstrated by Western analysis.**

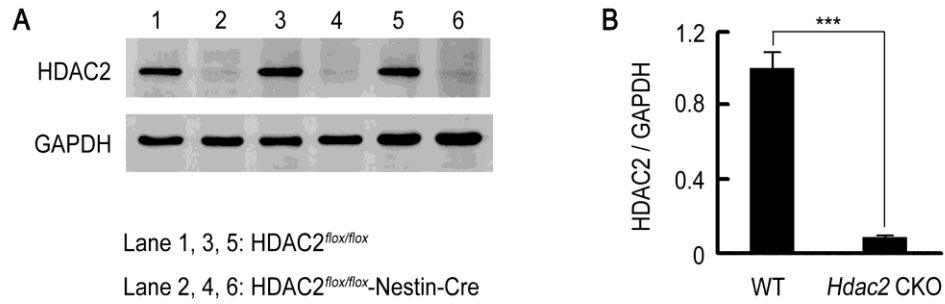

(A) Immunoblots showing HDAC2 levels in the cortex of *HDAC2<sup>flx/flx</sup>-Nestin-Cre* and control *HDAC2<sup>flx/flx</sup>* mice. (B) Bar graph showing cortex HDAC2 level of *Hdac2* CKO mice and WT littermates ( $n = 3$ , two-tailed  $t$  test,  $***P < 0.001$ ). HDAC2, histone deacetylase 2; *Hdac2* CKO, *Hdac2* conditional knockout; WT, wild type.

**Figure S5. *Hdac2* CKO leads to compensatory up-regulation of HDAC3.**

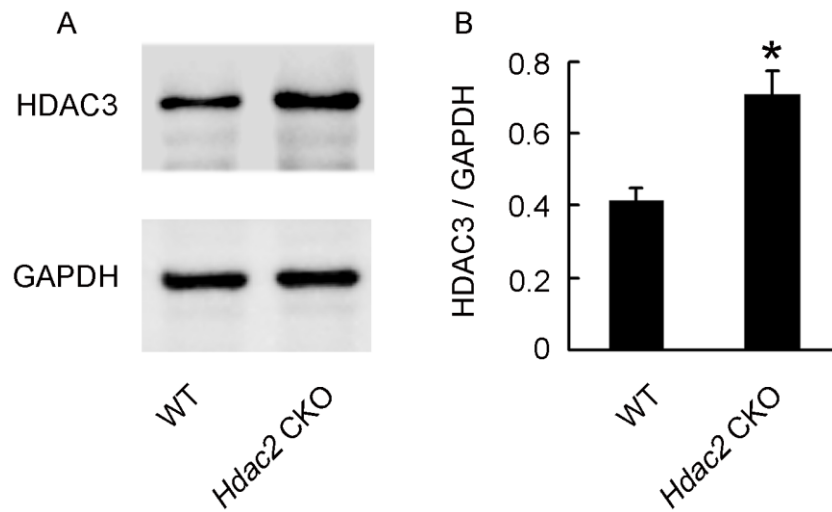

(A) Immunoblots showing HDAC3 levels in the cortex of WT and *Hdac2* CKO mice. (B) Bar graph showing cortex HDAC3 level of *Hdac2* CKO mice and WT littermates ( $n = 3$ , two-tailed  $t$  test,  $*P < 0.05$ ). *Hdac2* CKO, *Hdac2* conditional knockout; HDAC3, histone deacetylase 3; WT, wild type.

**Figure S6. Administration of SAHA during 4-10 d after stroke has no effect on infarct size.**

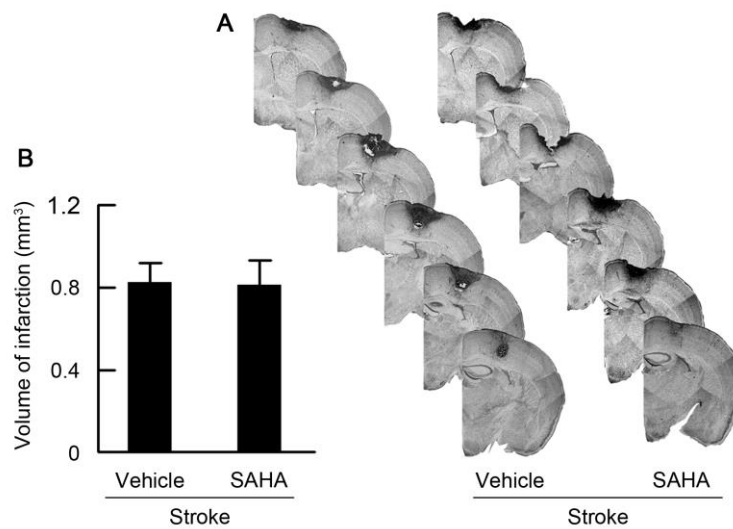

(A) Representative Nissl-stained sections at 11 d after stroke from stroke + vehicle and stroke + SAHA, respectively. (B) Bar graph showing stroke volume from stroke+vehicle and stroke + SAHA, respectively ( $n = 8$ , two tailed  $t$  test,  $P > 0.05$ ). SAHA, suberoylanilide hydroxamic acid.

**Figure S7. HDAC2 knockdown reversed, whereas HDAC2 over-expression further augmented stroke-induced down-regulation of neuroplasticity-related proteins.**

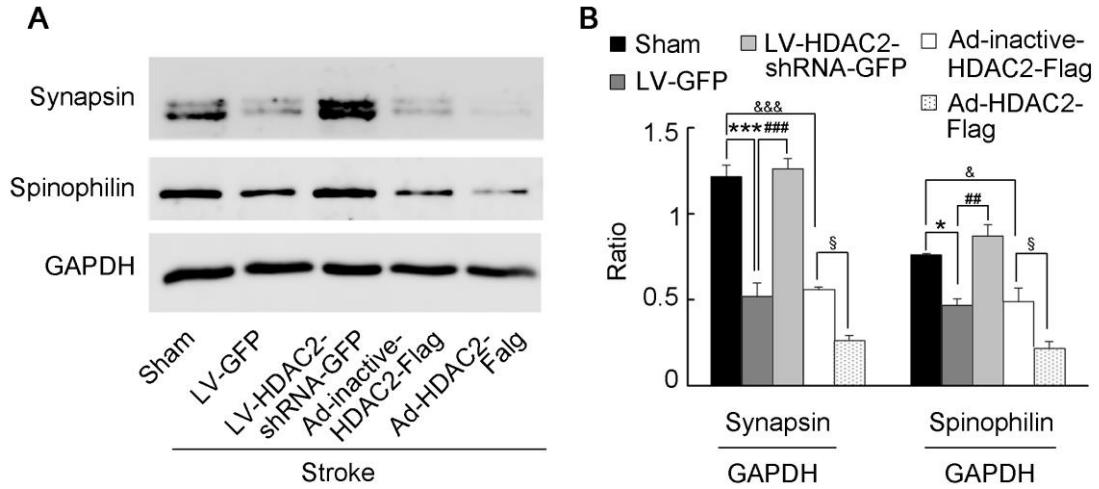

(A) Representative immunoblots and (B) Bar graph showing levels of Synapsin and Spinophilin in the peri-infarct cortex after stroke ( $n = 4$ , one-way ANOVA,  $^*P < 0.05$ ,  $^{***}P < 0.001$ , LV-GFP vs sham;  $^{##}P < 0.01$ ,  $^{###}P < 0.001$ , LV-HDAC2-shRNA-GFP vs LV-GFP;  $^{\&}P < 0.05$ ,  $^{\&\&\&}P < 0.001$ , Ad-inactive-HDAC2-Flag vs sham;  $^{\$}P < 0.05$ , Ad-HDAC2-Flag vs Ad-inactive-HDAC2-Flag ). HDAC2, histone deacetylase 2; LV, lentivirus; shRNA, short hairpin RNA; GFP, green fluorescent protein; Ad, adenovirus.
